# Supplementary material for: High-efficiency 18S microalgae barcoding by coalescent, distance and character-based approaches: a test in Chlorella and Scenedesmus
Source: Springer Nature journal article supplement (doi:10.1007/s00343-018-7201-y), 2018-09-01

Supplementary Table 1. List of specimens with the classification, collection locality, and voucher numbers. GenBank accession numbers are also given, some of which in bold were previously published.

| Strain designation | Collection locality                                      | Species               | GenBank accession number (18S) |
|--------------------|----------------------------------------------------------|-----------------------|--------------------------------|
|                    |                                                          | <i>Scenedesmus</i>    |                                |
| SM7-1              | Lake Hulunbeier, Neimeng, China, N 101.03°, E 45.98°     | <i>S. deserticola</i> | KX495003                       |
| SM7-3              | Lake Hulunbeier, Neimeng, China, N 101.03°, E 45.98°     | <i>S. deserticola</i> | KX495004                       |
| SM7-4              | Soil from Shihezi, Xinjiang, China, N 86.04°, E 46.25°   | <i>S. deserticola</i> | KX495008                       |
| SM1_3              | Lake Hulunbeier, Neimeng, China, N 101.03°, E 45.98°     | <i>S. deserticola</i> | KX494997                       |
| SM3_3              | Lake Hulunbeier, Neimeng, China, N 101.03°, E 45.98°     | <i>S. deserticola</i> | KX494986                       |
| SM5_4              | Changsha, Hunan, China, N 112.14°, E 28.07°              | <i>S. deserticola</i> | KX495009                       |
| BJ29-1             | Lake Zixia, Nanjing, Jiangsu, China, N 118.82°, E 32.05° | <i>S. deserticola</i> | KX495013                       |
| SM5_2              | Lake Taihu, China, N 120.01°, E 31.33°                   | <i>S. deserticola</i> | KX495002                       |
| BJ29-5             | Glacier in Arctic pole                                   | <i>S. deserticola</i> | KX495012                       |
| SM4_1              | Lake Donghu, Wuhan, China, N 114.40°, E 30.55°           | <i>S. deserticola</i> | KX494998                       |
| SM1_2              | Lake Donghu, Wuhan, China, N 114.40°, E 30.55°           | <i>S. deserticola</i> | KX494996                       |
| SM4_2              | Lake Donghu, Wuhan, China, N 114.40°, E 30.55°           | <i>S. deserticola</i> | KX494999                       |
| SM2_3              | Lake Donghu, Wuhan, China, N 114.40°, E 30.55°           | <i>S. deserticola</i> | KX494988                       |
| 6JQ_2              | Lake Mochou, Nanjing, China, N 118.76°, E 32.03°         | <i>S. deserticola</i> | KX494991                       |
| BJ29-3             | Glacier in Arctic pole                                   | <i>S. deserticola</i> | KX495014                       |
| SM2_2              | Lake Mochou, Nanjing, China, N 118.76°, E 32.03°         | <i>S. deserticola</i> | KX494987                       |
| SM1_1              | Lake Zixia, Nanjing, Jiangsu, China, N 118.82°, E 32.05° | <i>S. deserticola</i> | KX494995                       |
| DB5                | Glacier in Arctic pole                                   | <i>S. deserticola</i> | KX495007                       |
| 8XS1               | Soil from Shihezi, Xinjiang, China, N 86.04°, E 46.25°   | <i>S. deserticola</i> | KX494992                       |
| 8XS2               | Lake Hulunbeier, Neimeng, China, N 101.03°, E 45.98°     | <i>S. deserticola</i> | KX494993                       |
| SM6-4              | Soil from Shihezi, Xinjiang, China, N 86.04°, E 46.25°   | <i>S. deserticola</i> | KX495000                       |
| 8XS3               | Lake Zixia, Nanjing, Jiangsu, China, N 118.82°, E 32.05° | <i>S. deserticola</i> | KX494994                       |
| SB44_2             | Soil from Shihezi, Xinjiang, China, N 86.04°, E 46.25°   | <i>S. quadricauda</i> | KX495066                       |
| SB44_4             | Lake Hulunbeier, Neimeng, China, N 101.03°, E 45.98°     | <i>S. quadricauda</i> | KX495049                       |
| SB40_3             | Lake Mochou, Nanjing, China, N 118.76°, E 32.03°         | <i>S. quadricauda</i> | KX495048                       |
| SB76_1             | Donghu, Wuhan, China, N 114.40°, E 30.55°                | <i>S. bijuga</i>      | KX495027                       |
| SB76_2             | Lake Taihu, China, N 120.01°, E 31.33°                   | <i>S. bijuga</i>      | KX495050                       |
| SB76_4             | Lake Zixia, Nanjing, Jiangsu, China, N 118.82°, E 32.05° | <i>S. bijuga</i>      | KX495068                       |
| JS-1               |                                                          | <i>S. bijuga</i>      | <b>HQ900842</b>                |

|           |                                                        |                            |                 |
|-----------|--------------------------------------------------------|----------------------------|-----------------|
| SB959_2   | Lake Donghu, Wuhan, China, N 114.40°, E 30.55°         | <i>S. obliquus</i>         | KX495033        |
| SM9_1     | River, Nanjing, China, N 118.71°, E 32.05°             | <i>S. obliquus</i>         | KX495080        |
| SB12_3    | Lake Xuanwu, Nanjing, China, N 118.78°, E 32.07°       | <i>S. obliquus</i>         | KX495024        |
| SB12_4    | Lake Xuanwu, Nanjing, China, N 118.78°, E 32.07°       | <i>S. obliquus</i>         | KX495047        |
| SM9_4     | Lake Hulunbeier, Neimeng, China, N 101.03°, E 45.98°   | <i>S. obliquus</i>         | KX495082        |
| SM17_1    | Soil from Shihezi, Xinjiang, China, N 86.04°, E 46.25° | <i>S. obliquus</i>         | KX495073        |
| SM17_2    | Ningde, China, N 119.58°, E 26.63°                     | <i>S. obliquus</i>         | KX495074        |
| SM17_3    | Lake Hulunbeier, Neimeng, China, N 101.03°, E 45.98°   | <i>S. obliquus</i>         | KX495075        |
| SB12_1    | Lake Hulunbeier, Neimeng, China, N 101.03°, E 45.98°   | <i>S. bajacalifornicus</i> | KX495023        |
| SB12_2    | Zhoushan, Zhejiang, China, N 122.26°, E 30.03°         | <i>S. bajacalifornicus</i> | KX495046        |
| SM14_3    | Soil from Shihezi, Xinjiang, China, N 86.04°, E 46.25° | <i>S. bajacalifornicus</i> | KX495091        |
| SM14_2    | Lake Hulunbeier, Neimeng, China, N 101.03°, E 45.98°   | <i>S. bajacalifornicus</i> | KX495090        |
| SM8_1     | Lake Hulunbeier, Neimeng, China, N 101.03°, E 45.98°   | <i>S. bajacalifornicus</i> | KX495078        |
| SM19_4    | Lake Hulunbeier, Neimeng, China, N 101.03°, E 45.98°   | <i>S. bajacalifornicus</i> | KX495077        |
| SM8_3     | Lianyungang, China, N 118.71°, E 32.05°                | <i>S. bajacalifornicus</i> | KX495079        |
| SM9_3     | Lake Hulunbeier, Neimeng, China, N 101.03°, E 45.98°   | <i>S. bajacalifornicus</i> | KX495081        |
| SM13_3    | Soil from Shihezi, Xinjiang, China, N 86.04°, E 46.25° | <i>S. bajacalifornicus</i> | KX495089        |
| SM13_1    | Lake Taihu, China, N 120.01°, E 31.33°                 | <i>S. bajacalifornicus</i> | KX495087        |
| SM13_2    | Lake Xuanwu, Jiangsu, China, N 118.78°, E 32.07°       | <i>S. bajacalifornicus</i> | KX495088        |
| SB1221_1  | River, Lianyungang, China, N 118.71°, E 32.05°         | <i>S. acuminatus</i>       | KX495056        |
| SB1221_4  | River, Nanjing, China, N 118.71°, E 32.05°             | <i>S. acuminatus</i>       | KX495035        |
| SM3-1     | Lake Taihu, China, N 120.01°, E 31.33°                 | <i>S. armatus</i>          | KX494985        |
| SM5_1     | Lake Taihu, China, N 120.01°, E 31.33°                 | <i>S. armatus</i>          | KX495006        |
| SM6_1     | Lake Mochou, Nanjing, China, N 118.76°, E 32.03°       | <i>S. armatus</i>          | KX495005        |
| M1.5      |                                                        | <i>S. armatus</i>          | <b>KC505541</b> |
| FW005     |                                                        | <i>S. armatus</i>          | <b>KC699545</b> |
|           |                                                        | <i>S. armatus</i>          | <b>KC701521</b> |
|           |                                                        | <i>S. obtusu</i>           | <b>AB037091</b> |
| SM15_1    | Lake Taihu, China, N 120.01°, E 31.33°                 | <i>S. sp</i>               | KX495092        |
| SM15_4    | Lake Donghu, Wuhan, China, N 114.40°, E 30.55°         | <i>S. sp</i>               | KX495093        |
|           |                                                        | <i>Chlorella</i>           |                 |
| SB275_4   | Lake Xuanwu, Nanjing, China, N 118.78°, E 32.07°       | <i>C. sorokiniana</i>      | KX495032        |
| SB275_1   | Qingdao, China, N 118.71°, E 32.05°                    | <i>C. sorokiniana</i>      | KX495030        |
| SB275_2   | Xiamen, Fujian, China, N 118.13°, E 24.41°             | <i>C. sorokiniana</i>      | KX495053        |
| SB275_3_2 | Danjiang River, Henan, China, N 111.50°, E 32.53°      | <i>C. sorokiniana</i>      | KX495054        |
| SM11_2    | Soil from Shihezi, Xinjiang, China, N 86.04°, E 46.25° | <i>C. sorokiniana</i>      | KX495083        |
| SM11_4    | Soil from Shihezi, Xinjiang, China, N 86.04°, E 46.25° | <i>C. sorokiniana</i>      | KX495084        |

|            |                                                        |                       |                 |
|------------|--------------------------------------------------------|-----------------------|-----------------|
| SM12_4     | Soil from Shihezi, Xinjiang, China, N 86.04°, E 46.25° | <i>C. sorokiniana</i> | KX495086        |
| SM12_2     | Soil from Shihezi, Xinjiang, China, N 86.04°, E 46.25° | <i>C. sorokiniana</i> | KX495085        |
| BJ1_2_1    | Glacier in Arctic pole                                 | <i>C. sorokiniana</i> | KX495058        |
| SM21_2     | Lake Hulunbeier, Neimeng, China, N 101.03°, E 45.98°   | <i>C. sorokiniana</i> | KX495094        |
| SM18_2     | Lake Taihu, China, N 120.01°, E 31.33°                 | <i>C. sorokiniana</i> | KX495076        |
| NIES-2167  |                                                        | <i>C. sorokiniana</i> | <b>AB488789</b> |
| NIES-2169  |                                                        | <i>C. sorokiniana</i> | <b>AB488573</b> |
| UTEX 2805  |                                                        | <i>C. sorokiniana</i> | <b>AM423162</b> |
| SAG 211-8k |                                                        | <i>C. sorokiniana</i> | <b>FM205834</b> |
|            |                                                        | <i>C. sorokiniana</i> | <b>AB080307</b> |
| GXNN 01    |                                                        | <i>C. sorokiniana</i> | <b>EU402596</b> |
| XJ02       |                                                        | <i>C. sorokiniana</i> | <b>KC416208</b> |
| FC6 IITG   |                                                        | <i>C. sorokiniana</i> | <b>JX453208</b> |
|            |                                                        | <i>C. sorokiniana</i> | <b>KF209342</b> |
| RP1        |                                                        | <i>C. sorokiniana</i> | <b>KF569750</b> |
| SB1_1      | Qingdao, Shandong, China, N 118.71°, E 32.05°          | <i>C. vulgaris</i>    | KX495060        |
| SB1_4      | Jinan, Shandong, China, N 117.08°, E 36.62°            | <i>C. vulgaris</i>    | KX495061        |
| SB2_2      | Lake Taihu, China, N 120.01°, E 31.33°                 | <i>C. vulgaris</i>    | KX495015        |
| SB2_3      | Shihezi, Xinjiang, China, N 86.04°, E 46.25°           | <i>C. vulgaris</i>    | KX495062        |
| SB2_4      | Lake Xuanwuhu, Jiangsu, China, N 118.78°, E 32.07°     | <i>C. vulgaris</i>    | KX495038        |
| SB5_2      | Lake Chaohu, Anhui, China, N 117.59°, E 31.58°         | <i>C. vulgaris</i>    | KX495042        |
| SB5_3      | Lake Donghu, Wuhan, China, N 114.40°, E 30.55°         | <i>C. vulgaris</i>    | KX495020        |
| SB5_4      | Soil from Shihezi, Xinjiang, China, N 86.04°, E 46.25° | <i>C. vulgaris</i>    | KX495043        |
| SB8_1      | Fuzhou, Fujian, China, N 117.59°, E 31.58°             | <i>C. vulgaris</i>    | KX495021        |
| SB8_3      | Lake Xuanwuhu, Jiangsu, China, N 118.78°, E 32.07°     | <i>C. vulgaris</i>    | KX495044        |
| SB8_4      | Lake Taihu, China, N 120.01°, E 31.33°                 | <i>C. vulgaris</i>    | KX495022        |
| SB40_2     | Lake Hulunbeier, Neimeng, China, N 101.03°, E 45.98°   | <i>C. vulgaris</i>    | KX495025        |
| SB40_4     | Lake Donghu, Wuhan, China, N 114.40°, E 30.55°         | <i>C. vulgaris</i>    | KX495026        |
| SB962_3    | Qingdao, China, N 118.71°, E 32.05°                    | <i>C. vulgaris</i>    | KX495055        |
| SB962_4    | Qingdao, China, N 118.71°, E 32.05°                    | <i>C. vulgaris</i>    | KX495034        |
| SB231_1    | Pond, Wuhan, China, N 114.32°, E 30.42°                | <i>C. vulgaris</i>    | KX495028        |
| SB231_2    | Pond, Wuhan, China, N 114.32°, E 30.42°                | <i>C. vulgaris</i>    | KX495051        |
| SB231_3    | Lianyungang, Jiangsu, China, N 118.71°, E 32.05°       | <i>C. vulgaris</i>    | KX495029        |
| SB231_4    | Lake Zixia, Nanjing, Jiangsu, N 118.82°, E 32.05°      | <i>C. vulgaris</i>    | KX495052        |
| DB1        | Glacier in Arctic pole                                 | <i>C. vulgaris</i>    | KX494989        |
| SB1283_2   | Lake, Donghu, Wuhan, China, N 114.40°, E 30.55°        | <i>C. vulgaris</i>    | KX495057        |
| SB44_3     | Lake Taihu, China, N 120.01°, E 31.33°                 | <i>C. vulgaris</i>    | KX495067        |
| DB2        | Glacier in Arctic pole                                 | <i>C. vulgaris</i>    | KX494990        |
| BJ4_4_3    | Glacier in Arctic pole                                 | <i>C. vulgaris</i>    | KX495041        |
| 729_2      | University of Texas, 1987                              | <i>C. vulgaris</i>    | KX495037        |

|             |                                                          |                         |                 |
|-------------|----------------------------------------------------------|-------------------------|-----------------|
| BJ30_3      | Glacier in Arctic pole                                   | <i>C. vulgaris</i>      | KX495001        |
| G41_3       | Soil from Shihezi, Xinjiang, China, N 86.04°, E 46.25°   | <i>C. vulgaris</i>      | KX495010        |
| SM7_2       | Soil from Shihezi, Xinjiang, China, N 86.04°, E 46.25°   | <i>C. vulgaris</i>      | KX495011        |
| BJ3_1_1     | Glacier in Arctic pole                                   | <i>C. vulgaris</i>      | KX495016        |
| BJ4_3_3     | Glacier in Arctic pole                                   | <i>C. vulgaris</i>      | KX495017        |
| BJ4_4_2     | Glacier in Arctic pole                                   | <i>C. vulgaris</i>      | KX495018        |
| BJ6_2_3     | Glacier in Arctic pole                                   | <i>C. vulgaris</i>      | KX495019        |
| BJ6_3_3     | Glacier in Arctic pole                                   | <i>C. vulgaris</i>      | KX495059        |
| BJ4_4_1     | Glacier in Arctic pole                                   | <i>C. vulgaris</i>      | KX495036        |
| SB1283_4    | Lake, Donghu, Wuhan, China, N 114.40°, E 30.55°          | <i>C. vulgaris</i>      | KX495036        |
| OW-01       |                                                          | <i>C. vulgaris</i>      | <b>JQ664295</b> |
|             |                                                          | <i>C. vulgaris</i>      | <b>GU295219</b> |
| Prag A14    |                                                          | <i>C. vulgaris</i>      | <b>X74001</b>   |
| SB4_1       | Lake Baiyangdian, Hebei, China, N 115.95°, E 38.80°      | <i>C. saccharophila</i> | KX495039        |
| SB4_2       | Lake Hulunbeier, Neimeng, China, N 101.03°, E 45.98°     | <i>C. saccharophila</i> | KX495063        |
| SB4_3       | Lake Zixia, Nanjing, Jiangsu, China, N 118.82°, E 32.05° | <i>C. saccharophila</i> | KX495064        |
| SB4_4       | Charles University in Prague                             | <i>C. saccharophila</i> | KX495065        |
| SB275_3_1   | Danjiang River, Henan, China, N 111.50°, E 32.53°        | <i>C. saccharophila</i> | KX495031        |
| SB8_5       | Lake Taihu, China, N 120.01°, E 31.33°                   | <i>C. saccharophila</i> | KX495045        |
| SB729_1     | University of Texas, 1987                                | <i>C. saccharophila</i> | KX495069        |
| SB962_1     | University of Texas, 1987                                | <i>C. saccharophila</i> | KX495072        |
| SB729_3     | Pond at state New York, USA                              | <i>C. saccharophila</i> | KX495070        |
| SB959_4     | Pond at state New York, USA                              | <i>C. saccharophila</i> | KX495071        |
| UTEX 2219-4 |                                                          | <i>C. minutissima</i>   | <b>HQ218939</b> |
| C-1.1.9     |                                                          | <i>C. minutissima</i>   | <b>X56102</b>   |
|             |                                                          | <i>C. minutissima</i>   | <b>AB006046</b> |
|             |                                                          | Out group               |                 |
| VI8         |                                                          | Chlorococcales          | <b>FJ946903</b> |
| II4         |                                                          | Chlorococcales          | <b>FJ946902</b> |
| VI12        |                                                          | Chlorococcales          | <b>FJ946905</b> |
| VII3        |                                                          | Chlorococcales          | <b>FJ946904</b> |

**Supplementary Figure 1.** Automatic partition of tellinaceans based on 18S gene. The number of groups inside the partition (initial and recursive) of each given prior intraspecific divergence value were reported.

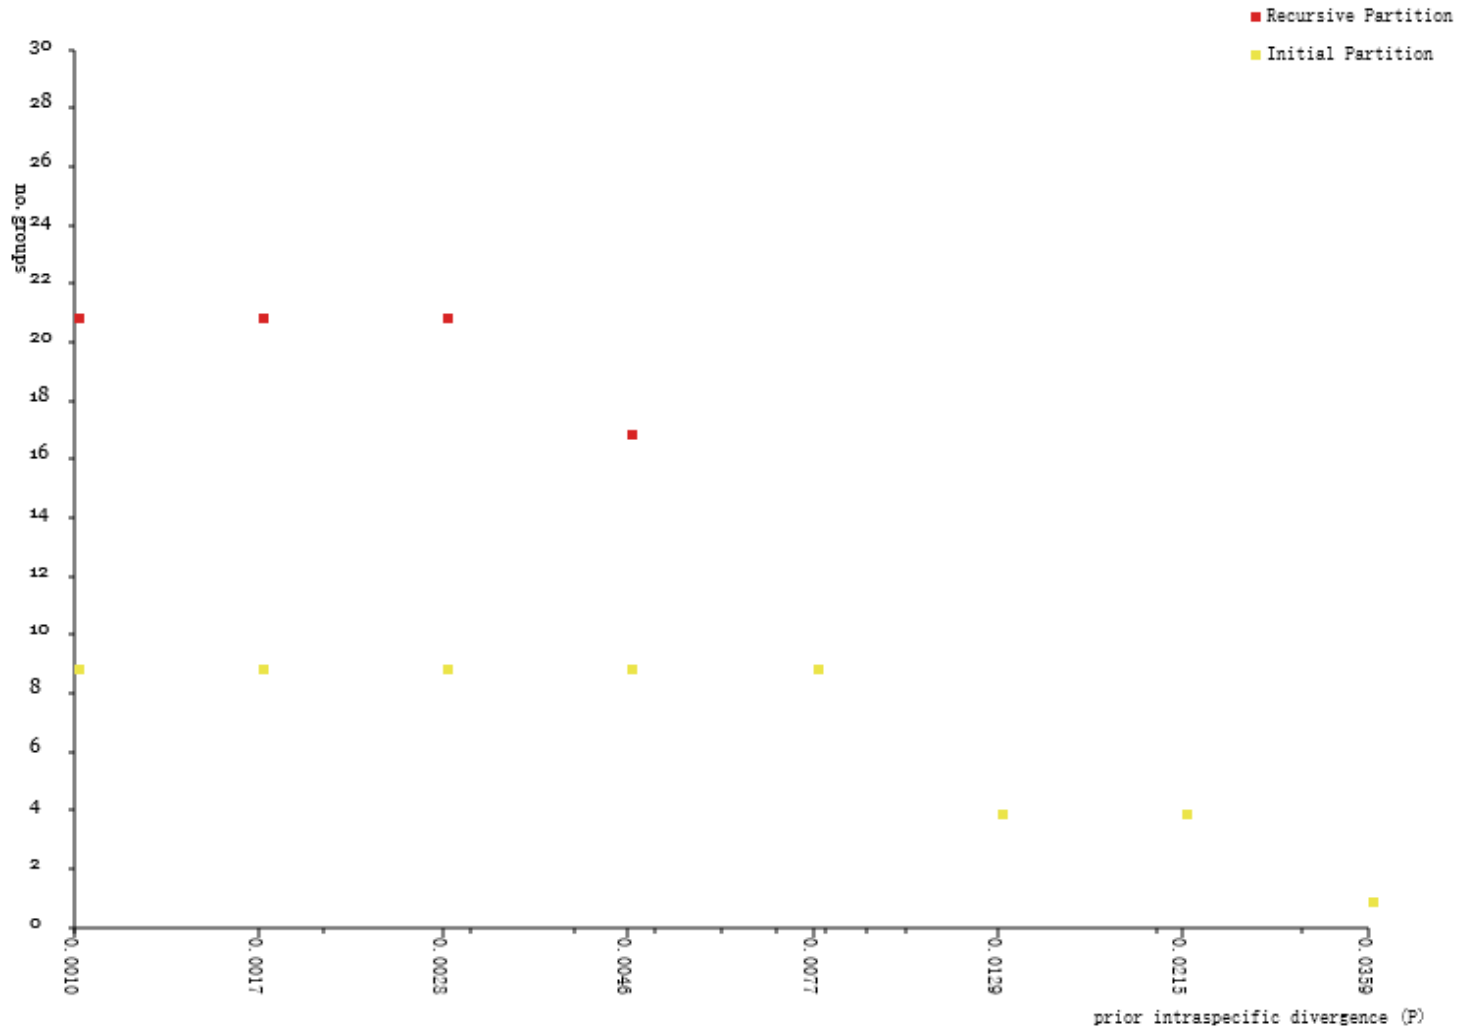

Supplement: 343_2018_7201_MOESM1_ESM.pdf [file 343_2018_7201_MOESM1_ESM.pdf]
